# Supplementary material
Source: PubMed Central journal article supplement (PMC6467757)
Supplement: NIHMS995746-supplement-Supplemental_Info.pdf [file NIHMS995746-supplement-Supplemental_Info.pdf]

# SI: A streamlined, general approach for computing ligand binding free energies and its application to GPCR-bound cholesterol

Reza Salari,<sup>†,‡</sup> Thomas Joseph,<sup>¶,†</sup> Ruchi Lohia,<sup>†</sup> Jérôme Hénin,<sup>§,||</sup> and Grace  
Brannigan<sup>\*,†,‡,||</sup>

<sup>†</sup>*Center for Computational and Integrative Biology, Rutgers University, Camden, NJ, USA*

<sup>‡</sup>*Department of Physics, Rutgers University, Camden, NJ, USA*

<sup>¶</sup>*Department of Anesthesia and Critical Care, University of Pennsylvania Perelman School  
of Medicine, Philadelphia, PA, USA*

<sup>§</sup>*Laboratoire de Biochimie Théorique, Institut de Biologie Physico-Chimique, CNRS, Paris,  
France*

<sup>||</sup>*These authors contributed equally to supervising this work.*

E-mail: [grace.brannigan@rutgers.edu](mailto:grace.brannigan@rutgers.edu)

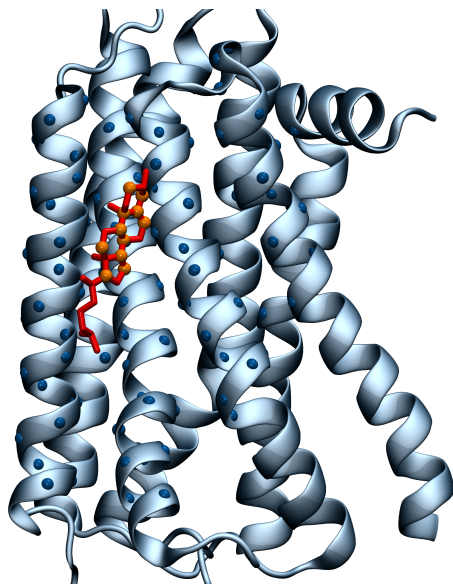

**Figure S1. Definition of a distance-to-bound-configuration coordinate.** The  $\beta_2$ -adrenergic receptor is rendered in blue as ribbons, bound cholesterol in red. Atoms of cholesterol and the receptor involved in defining the DBC coordinate are shown as orange and blue spheres, respectively.

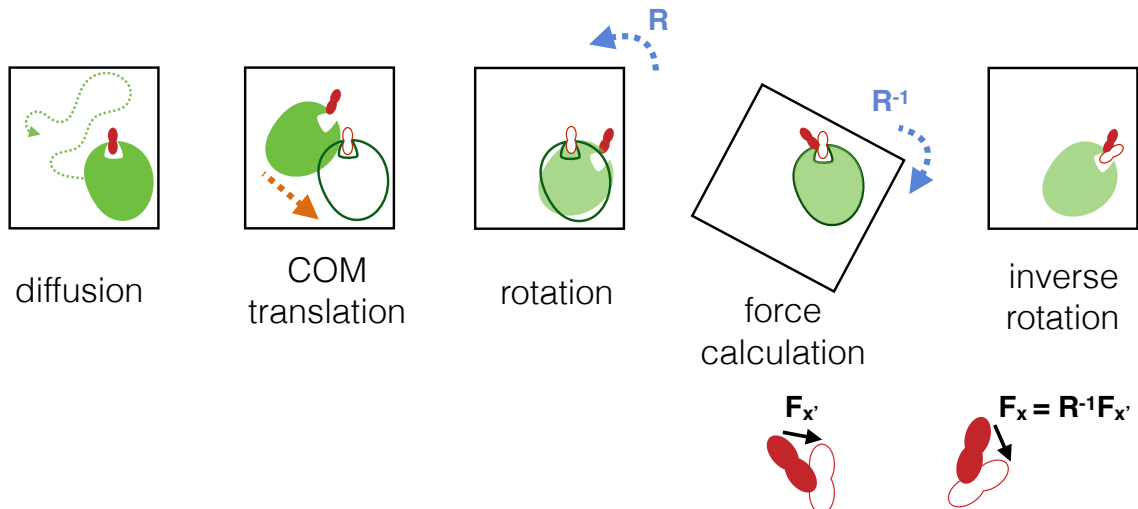

**Figure S2. Rotations and translations in calculation of a distance-to-bound-configuration coordinate.** A) The green receptor with red ligand bound diffuses away from its initial (reference) configuration. B) The center of mass (COM) is translated back to the reference position. C) The optimal rotation operation  $\mathbf{R}$  for aligning the protein onto the reference coordinates is determined. D) A force is derived from the restraint potential, using the RMSD between the ligand and its reference coordinates. E) The direction of the force vector is inversely rotated with  $\mathbf{R}^{-1}$

|                                                              |                                               | $\beta 2$<br>adrenergic | 5HT-2B | $\mu$<br>Opioid |
|--------------------------------------------------------------|-----------------------------------------------|-------------------------|--------|-----------------|
| $\Delta G_r = k_B T \ln \frac{Z_r^\Delta}{Z_g^\Delta Z_b^-}$ | Replica 1(kcal/mol)                           | 34.4                    | 25.6   | 23.1            |
|                                                              | Replica 2(kcal/mol)                           | 33.9                    | 25.2   | 25.7            |
|                                                              | Replica 3(kcal/mol)                           | 34.5                    | 27.0   | 25.7            |
|                                                              | Arithmetic Mean(kcal/mol)                     | 34.3                    | 25.9   | 24.8            |
|                                                              | Standard Error(kcal/mol)                      | 0.2                     | 0.5    | 0.9             |
| $\frac{Z_r^\Delta}{Z_g^\Delta Z_b^-}$                        | Replica 1                                     | 2E+25                   | 7E+18  | 1E+17           |
|                                                              | Replica 2                                     | 9E+24                   | 4E+18  | 8E+18           |
|                                                              | Replica 3                                     | 2E+25                   | 7E+19  | 8E+18           |
|                                                              | Arithmetic Mean                               | 2E+25                   | 3E+19  | 6E+18           |
|                                                              | Standard Error                                | 5E+24                   | 2E+19  | 3E+18           |
|                                                              | Geometric Mean                                | 2E+25                   | 1E+19  | 2E+18           |
| $x_{50}$                                                     | Replica 1                                     | 5E-10                   | 2E-03  |                 |
|                                                              | Replica 2                                     | 1E-09                   | 3E-03  | 1E-03           |
|                                                              | Replica 3                                     | 4E-09                   | 1E-04  | 1E-03           |
|                                                              | Arithmetic Mean                               | 2E-09                   | 2E-03  | 1E-03           |
|                                                              | Standard Error                                | 1E-09                   | 8E-04  |                 |
|                                                              | Geometric Mean                                | 1E-09                   | 8E-04  | 1E-03           |
|                                                              | Determined using single shaded Geometric Mean | 6E-10                   | 1E-03  | 6E-03           |

**Table S1. Dispersion in protein decoupling  $\left(\frac{Z_r^\Delta}{Z_g^\Delta Z_b^-}\right)$  calculations across replicas, and resulting uncertainty in  $x_{50}$ .** Shaded row corresponds to values in Table 6. For values of  $\left(\frac{Z_r^\Delta}{Z_g^\Delta Z_b^-}\right)$  weaker than  $10^{18}$ , no  $x_{50}$  could be predicted, because occupancy was expected to plateau below 50%.
